# Supplementary material for: Update on comparative genome mapping between Malus and Pyrus
Source: PubMed Central journal article supplement (PMC2749866; doi:10.1186/1756-0500-2-182), 2009-09-14

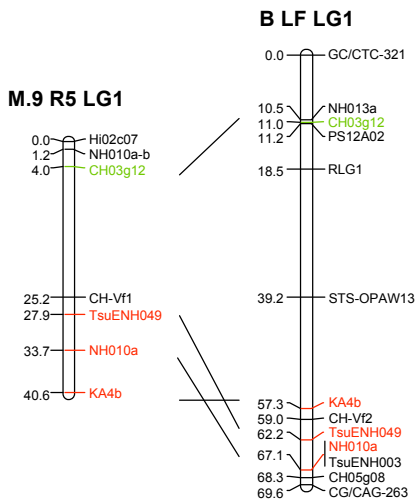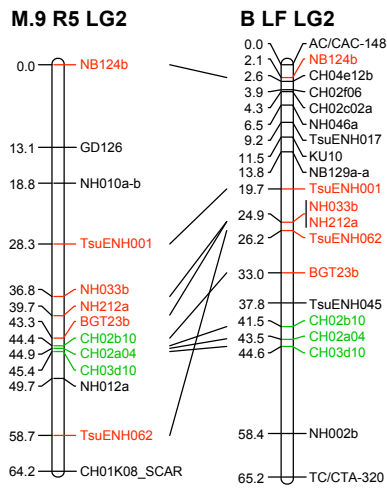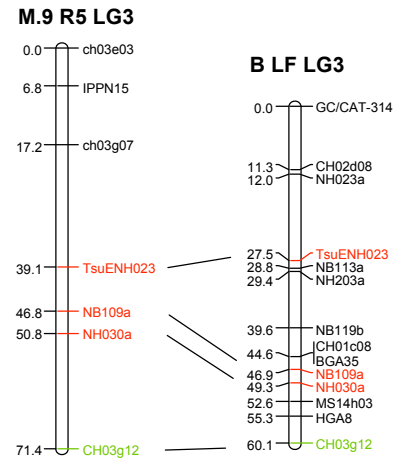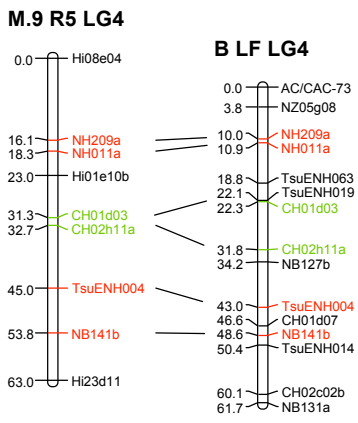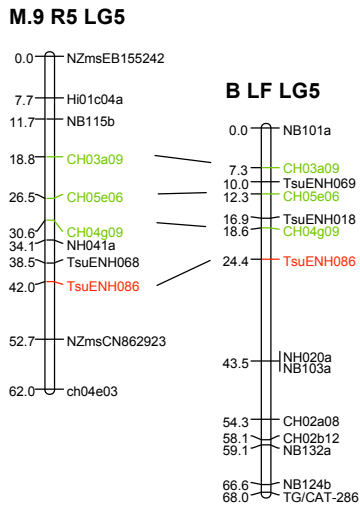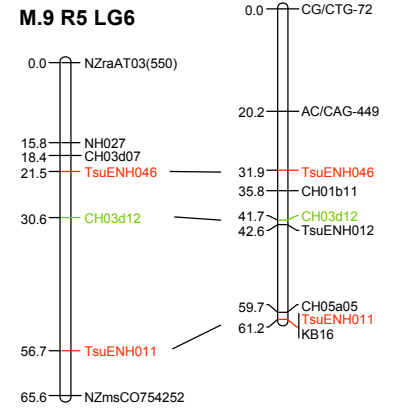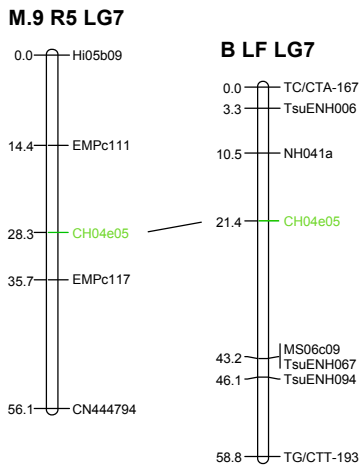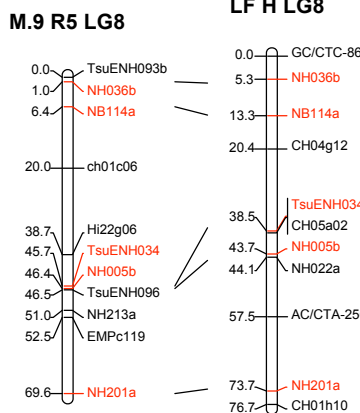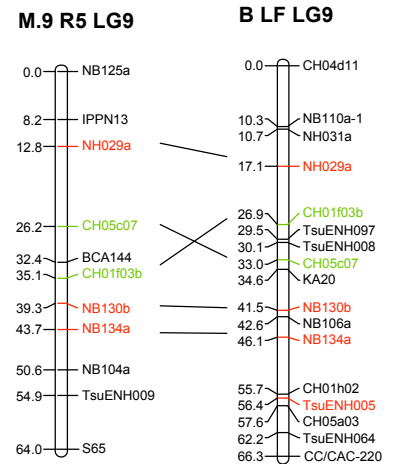

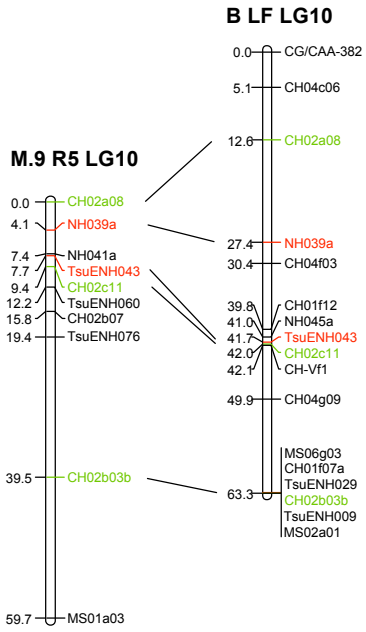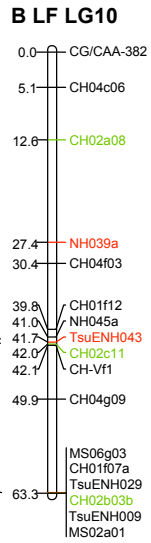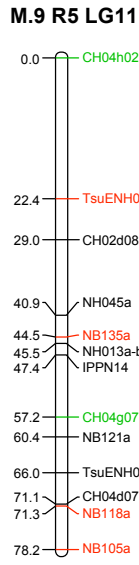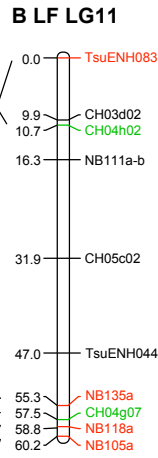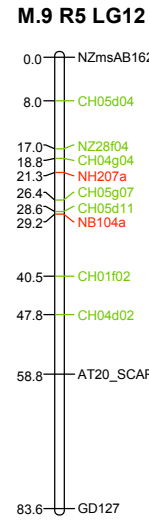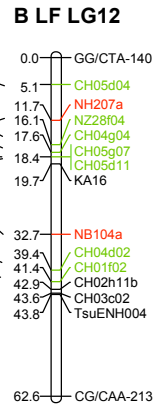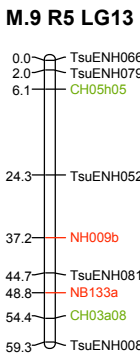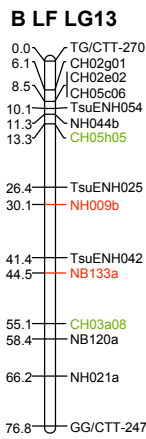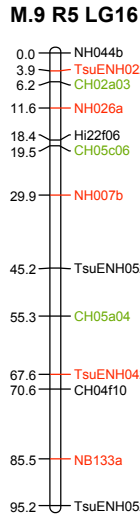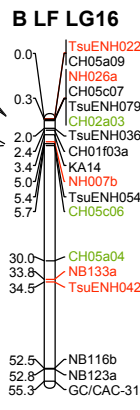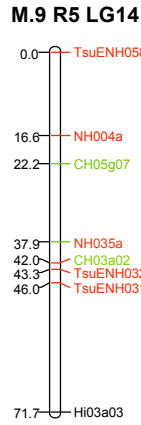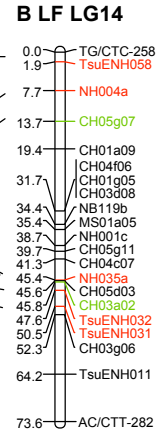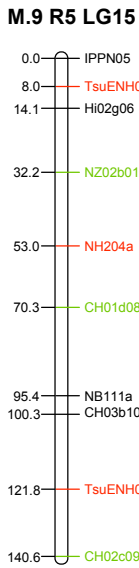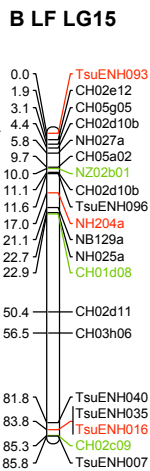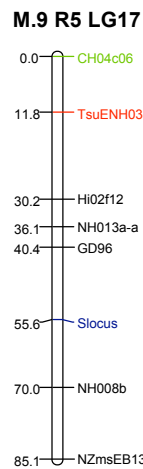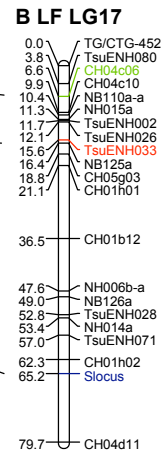

Supplement: 1756-0500-2-182-S1.pdf [file 1756-0500-2-182-S1.pdf]
